# Supplementary material
Source: PubMed Central journal article supplement (PMC7992163)
Supplement: NIHMS1676925-supplement-Supporting_Information.pdf [file NIHMS1676925-supplement-Supporting_Information.pdf]

# Supporting Information

## **Microporous Bio-orthogonally Annealed Particle Hydrogels for Tissue Engineering and Regenerative Medicine**

*Alisa Isaac<sup>1‡</sup>, Faraz Jivan<sup>1‡</sup>, Shangjing Xin<sup>1</sup>, Jacob Hardin<sup>1</sup>, Xianghong Luan<sup>2</sup>, Mirali Pandya<sup>2</sup>,  
Thomas G. H. Diekwisch<sup>2</sup>, Daniel L. Alge<sup>1,3,\*</sup>*

<sup>1</sup>Department of Biomedical Engineering, Texas A&M University, College Station, TX, USA  
77843

<sup>2</sup>Department of Periodontics, Texas A&M University, Dallas, TX, USA 75246

<sup>3</sup>Department of Materials Science and Engineering, Texas A&M University, College Station,  
TX, USA 77843

<sup>‡</sup>A.I. and F.J. contributed equally to this work.

\* To whom correspondence should be addressed.

\* Corresponding author: Tel.: 979-458-9248, Fax: 979-845-4450;

E-mail address: dalge@tamu.edu

Supplemental Information consists of two figures over two pages.

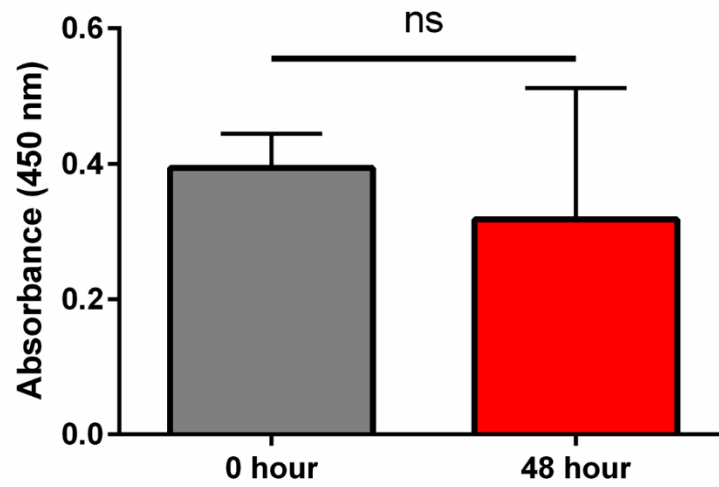

**Figure S1:** Relative PDGF-BB retention within TzMAP hydrogels measured directly via modified ELISA at 0 hour and 48 hours, and normalized to blank TzMAP hydrogel.

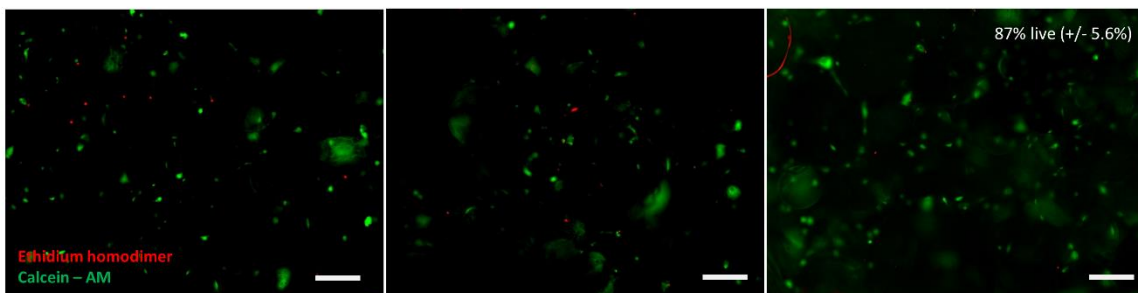

**Figure S2.** Representative images of live/dead staining of PDLSCs 24 hours after encapsulation. Scale bars = 200  $\mu$ m.
